# Supplementary material for: Structural Features Governing the Metabolic Stability of Tetraethyl-Substituted Nitroxides in Rat Liver Microsomes
Source: MDPI journal article supplement (doi:10.3390/antiox12020402), 2023-02-07
Supplement: s1 [file s1]

## Supplementary material

### Structural features governing the metabolic stability of tetraethyl-substituted nitroxides in rat liver microsomes

A. Rančić<sup>(1)</sup>, N. Babić<sup>(1)</sup>, M. Orio<sup>(2)</sup>, F. Peyrot<sup>(1,3)</sup>

(1) Université Paris Cité, CNRS, Laboratoire de Chimie et de Biochimie Pharmacologiques et Toxicologiques, F-75006 Paris, France; (2) Aix-Marseille Univ., CNRS, Centrale Marseille, iSm2; (3) Sorbonne Université, Institut National Supérieur du Professorat et de l'Éducation (INSPE) de l'Académie de Paris, Paris, France

#### Table of contents

|                                                                                                                                    |   |
|------------------------------------------------------------------------------------------------------------------------------------|---|
| 1. Estimation of lipophilicity.....                                                                                                | 1 |
| 2. Characterization of nitroxide <b>5</b> .....                                                                                    | 1 |
| 3. HPLC-HRMS analysis of anaerobic incubations of nitroxide <b>5</b> with ascorbate .....                                          | 3 |
| 4. EasySpin simulations .....                                                                                                      | 4 |
| 5. HPLC-HRMS analysis of nitroxide <b>5</b> when incubated with RLM enriched in NADPH under anaerobic and aerobic conditions ..... | 5 |
| 6. DFT calculations.....                                                                                                           | 6 |

#### 1. Estimation of lipophilicity

**Supplementary Table S1.** *ClogP*, *pKa* and *logD<sub>7.4</sub>* values calculated for ionizable compounds under study.

| Nitroxide                 | <b>2</b> | <b>3</b> | <b>4</b> | <b>5</b> |
|---------------------------|----------|----------|----------|----------|
| <i>ClogP</i>              | 0.811    | 2.927    | 2.828    | 4.261    |
| <i>pKa</i>                | 4.776    | 4.835    | 3.519    | 4.434    |
| <i>logD<sub>7.4</sub></i> | -1.814   | 0.362    | -1.054   | 1.295    |

#### 2. Characterization of nitroxide **5**

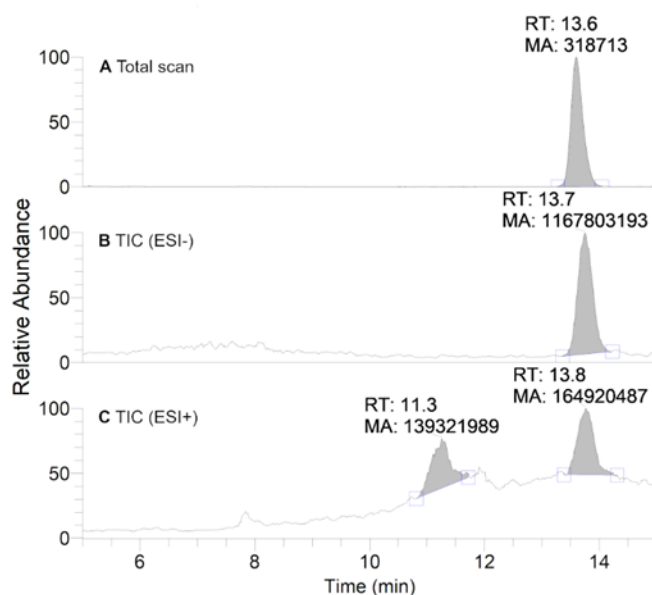

**Supplementary Figure S1.** Total scan UV-Vis (A), TIC (ESI<sup>-</sup>) (B) and (ESI<sup>+</sup>) (C) chromatograms of nitroxide **5** (100 μM).

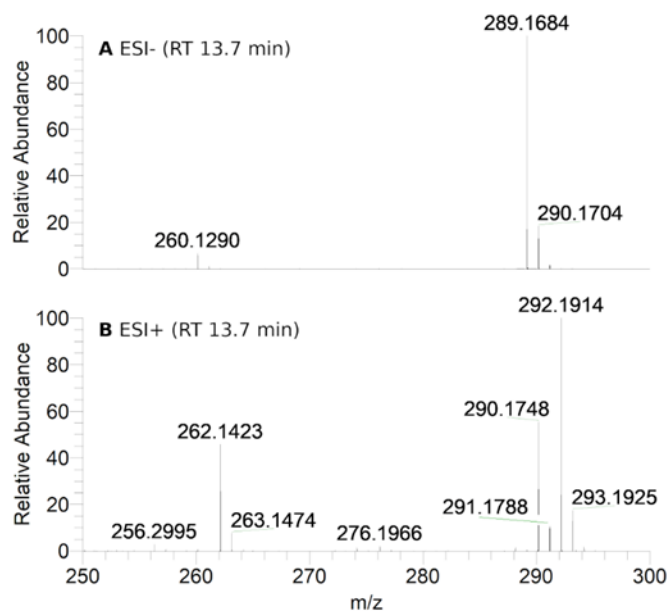

**Supplementary Figure S2.** HRMS spectrum of nitroxide **5** in positive (**A**) and negative mode (**B**).  $m/z$  calcd. for  $C_{17}H_{23}NO_3$   $[(M-H)^-]$ : 289.1683;  $C_{17}H_{24}NO_3$   $[M^+]$ : 290.1751;  $C_{17}H_{26}NO_3$   $[(M+2H)^+]$ : 292.1907. Fragments at  $m/z$  calcd. for  $C_{15}H_{18}NO_3$   $[(M-C_2H_5-H)^-]$ : 260.1292;  $C_{15}H_{20}NO_3$   $[(M-C_2H_5+H)^+]$ : 262.1437 are consistent with fragmentation patterns observed for other isoindoline nitroxides [1].

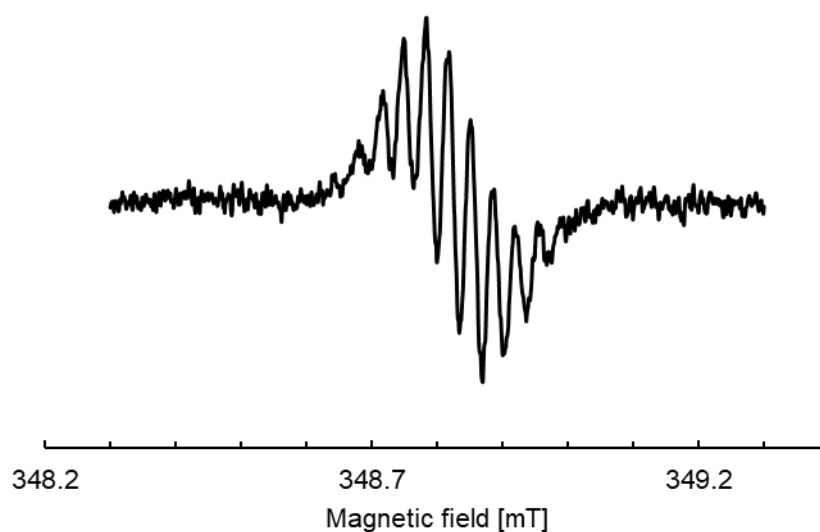

**Supplementary Figure S3.** Superhyperfine structure of nitroxide **5** (100  $\mu$ M) in potassium phosphate buffer (0.1 M,  $pH$  7.4, containing 1 mM DTPA) in the absence of oxygen at 21  $^{\circ}C$ : close-up on the low-field line. The recording parameters are given in the experimental section.

### 3. HPLC-HRMS analysis of anaerobic incubations of nitroxide 5 with ascorbate

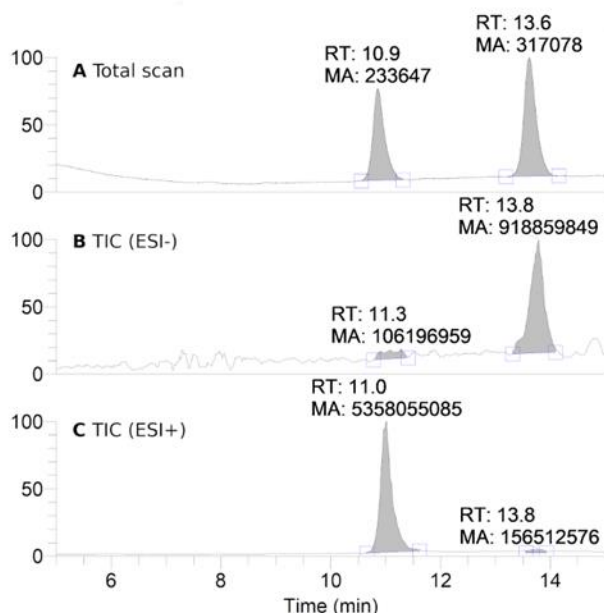

**Supplementary Figure S4.** Total scan UV-Vis (A), TIC (ESI<sup>-</sup>) (B) and (ESI<sup>+</sup>) (C) chromatograms of the incubations of nitroxide 5 (100  $\mu$ M) with sodium L-ascorbate (800 mM) in pure water upon anaerobic conditions. Samples were prepared and analyzed as described in the experimental section.

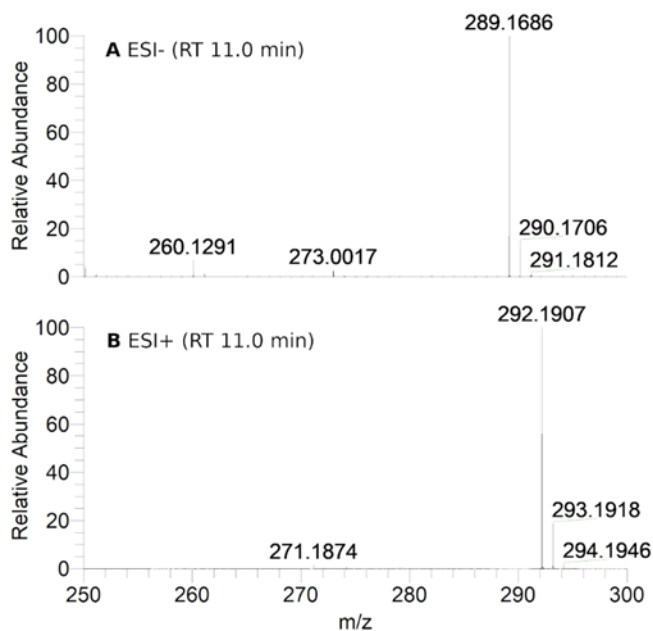

**Supplementary Figure S5.** HRMS spectra of the hydroxylamine product eluted at RT 11.0 min in the HPLC analysis of the anaerobic incubation of nitroxide 5 (100  $\mu$ M) with sodium L-ascorbate (800 mM) in pure water after 60 min obtained in ESI<sup>-</sup> (A) and ESI<sup>+</sup> (B) modes, respectively.

#### 4. EasySpin simulations

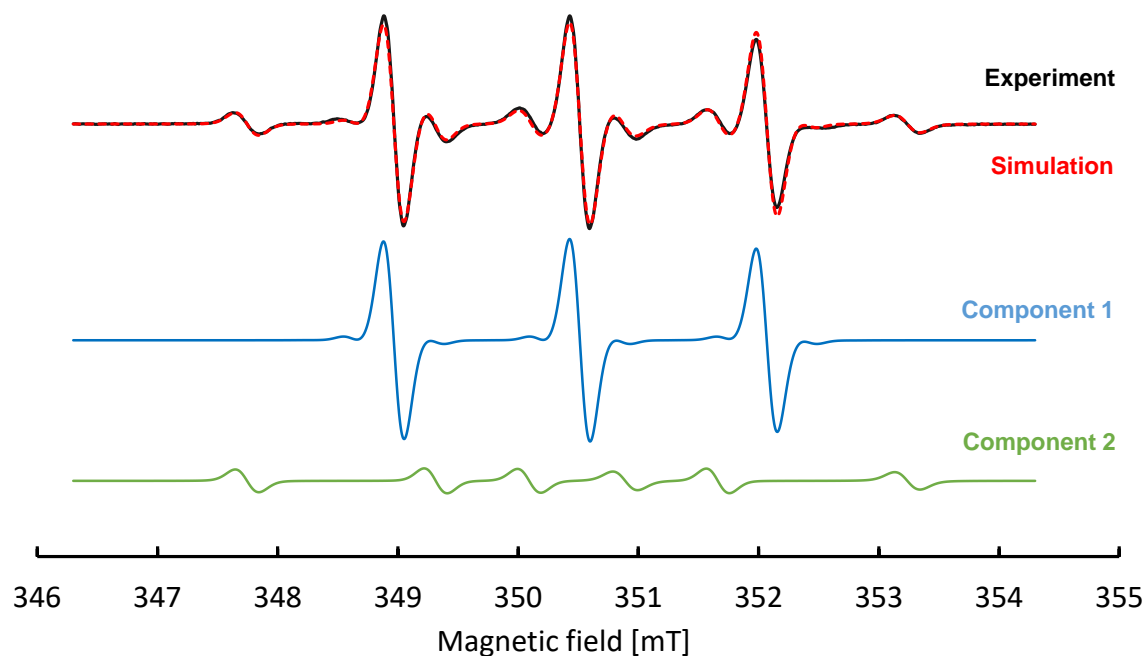

**Supplementary Figure S6.** Experimental spectrum (black line) of nitroxide **5** (300  $\mu\text{M}$ ) incubated with RLM (7.8  $\text{mg}\cdot\text{ml}^{-1}$  protein, 30  $\mu\text{M}$  P450) enriched in 2 mM NADPH after 10 min under aerobic conditions at 21  $^{\circ}\text{C}$  overlapped with the simulated EPR spectrum (red dashed line). Below are the simulated spectra of nitroxide **5** (component 1, blue line) and the simulated EPR spectrum of the new 6-line species (component 2, green line). The parameters used in the simulation are given in Supplementary Table S2.

**Supplementary Table S2.** EPR spectral characteristics of identified species observed in the reaction of nitroxide **5** with RLM and NADPH. The hyperfine coupling constants ( $A_{\text{N}}$ ,  $A_{\text{H}}$ ,  $A^{13\text{C}}$ ) and linewidth parameter ( $\Delta B$ ) were extracted by simulation with EasySpin. The concentrations ( $C$  [ $\mu\text{M}$ ]) are calculated from the ratio of the two compounds extracted from the simulation and a calibration curve for nitroxide **5**. Presented values estimate the concentrations of nitroxide **5** and 6-line intermediate 10 minutes after mixing 300  $\mu\text{M}$  nitroxide **5** with RLM (7.7  $\text{mg prot}\cdot\text{ml}^{-1}$ ; 30  $\mu\text{M}$  P450) and 2 mM NADPH upon aerobic conditions at 21  $^{\circ}\text{C}$ .

|                             | Nitroxide <b>5</b> | 6-line intermediate |
|-----------------------------|--------------------|---------------------|
| $A_{\text{N}}$ [mT]/[MHz]   | 1.56/43.6          | 15.8/44.3           |
| $A_{\text{H}}$ [mT]/[MHz]   | -                  | 2.36/66.0           |
| $A^{13\text{C}}$ [mT]/[MHz] | 0.68/19.0          | -                   |
| $\Delta B$ [mT]             | 0.19               | 0.21                |

## 5. HPLC-HRMS analysis of nitroxide 5 when incubated with RLM enriched in NADPH under anaerobic and aerobic conditions

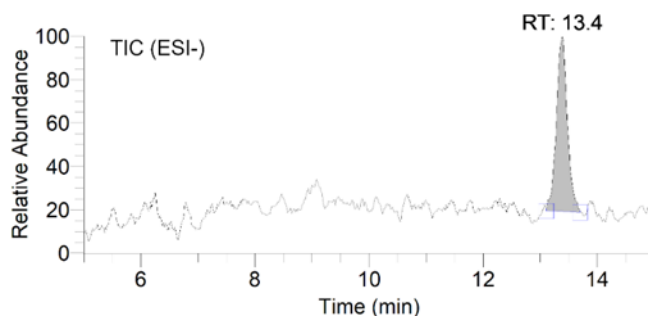

**Supplementary Figure S7.** HPLC-HRMS study of nitroxide 5 (300  $\mu\text{M}$ ) incubated with RLM (7.8  $\text{mg}\cdot\text{ml}^{-1}$  protein, 30  $\mu\text{M}$  P450) supplemented with NADPH (2 mM) in potassium phosphate buffer (100 mM;  $pH$  7.4) upon aerobic conditions after 60 minutes: the TIC chromatogram in ESI<sup>-</sup> only shows the starting material at RT = 13.4 min. Peaks in TIC chromatograms are observed with a delay of 0.2 min compared to UV-Vis detection.

**Supplementary Table S3.** Main absorption bands in the UV spectra from HPLC-HRMS study of nitroxide 5 (300  $\mu\text{M}$ ) incubated with RLM (7.8  $\text{mg ml}^{-1}$  protein, 30  $\mu\text{M}$  P450) enriched in NADPH (2 mM) in potassium phosphate buffer (0.1 M,  $pH$  7.4) under aerobic conditions at 21°C (see Figure 6).

| RT [min] | UV absorption bands [nm] |
|----------|--------------------------|
| 6.0      | 233                      |
| 7.6      | 312                      |
| 7.9      | 273                      |
| 8.8      | 239                      |
| 9.0      | 272                      |
| 9.3      | 239                      |
| 13.2     | 237                      |

## 6. DFT calculations

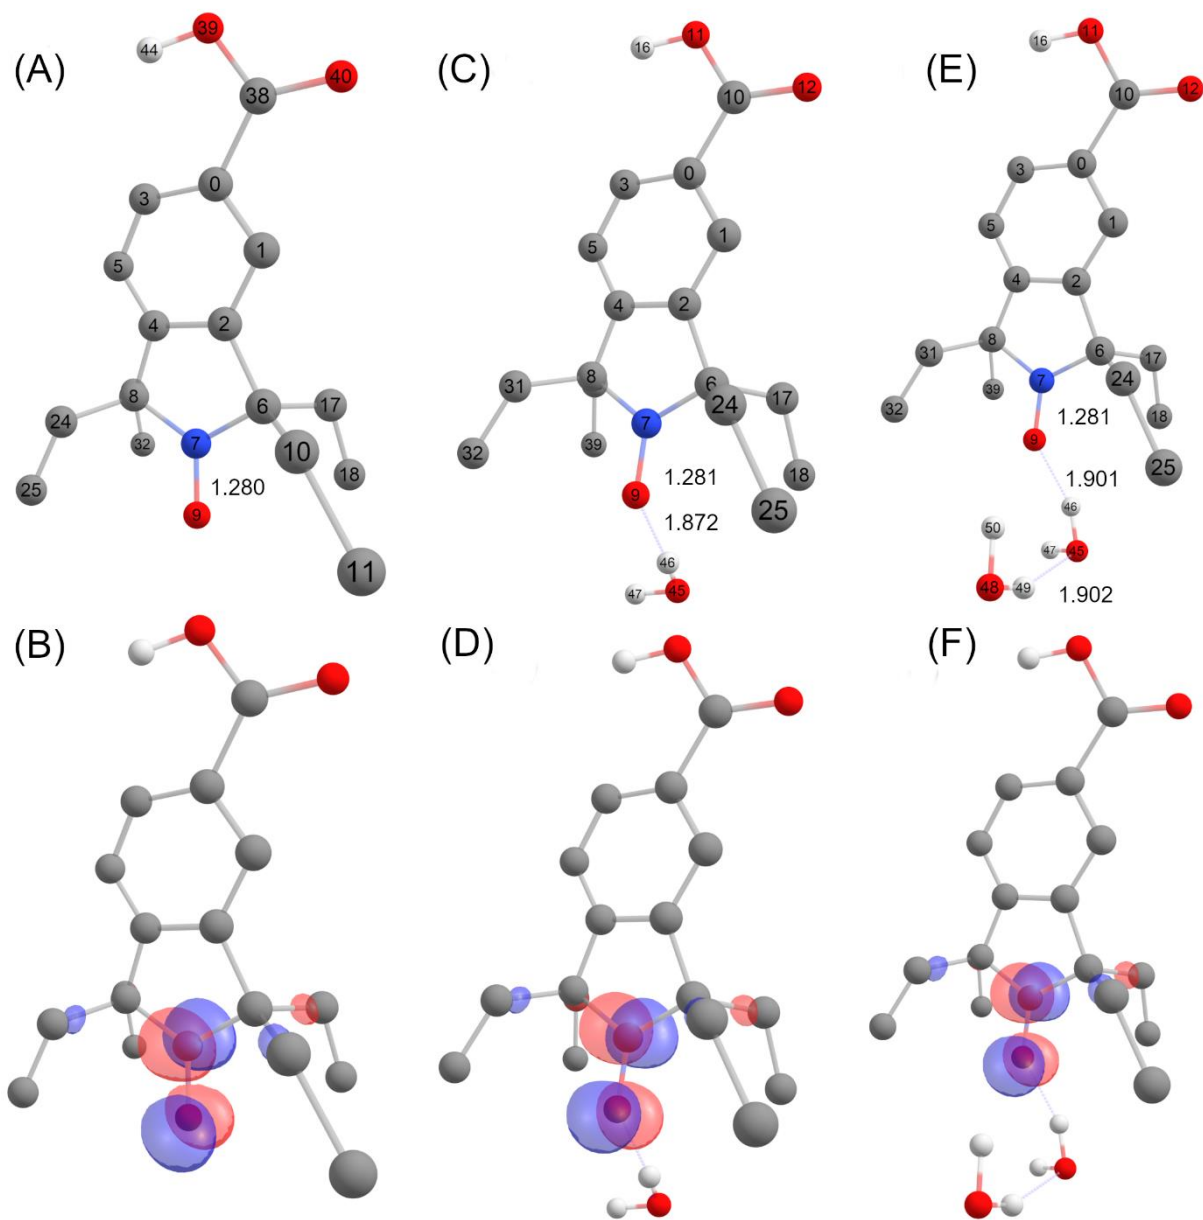

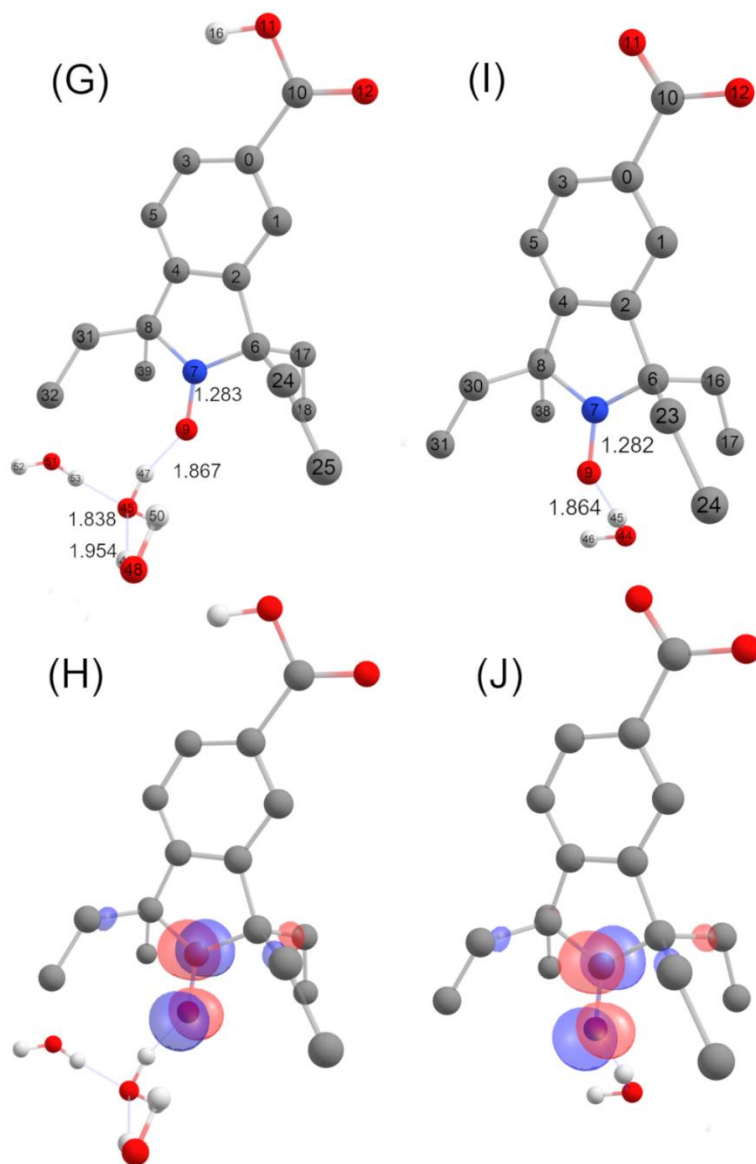

**Supplementary Figure S8.** DFT-optimized structures for nitroxide **5** without (**A**, **B**), with one (**C**, **D**), two (**E**, **F**), and three (**G**, **H**) explicit water molecules and in carboxylate form with one explicit water molecule (**I**, **J**) together with selected metrical parameters (Å) (**A**, **C**, **E**, **G**, **I**), and localized SOMOs (**B**, **D**, **F**, **H**, **J**). Hydrogen atoms attached to carbon centers were omitted of clarity.

**Supplementary Table S4.** DFT-computed hyperfine coupling constants of nitroxide **5** using the B3LYP/G functional and various basis sets.

| Basis set | A <sub>N</sub> [MHz] | A <sub>N</sub> [G] |
|-----------|----------------------|--------------------|
| TZVP      | 25.82                | 9.21               |
| EPR-II    | 28.12                | 10.03              |
| SVP       | 58.07                | 20.72              |
| 6-31g*    | <b>37.19</b>         | <b>13.27</b>       |
| EPR-III   | Not converged        |                    |

**Supplementary Table S5.** Free energies and DFT-computed nitrogen hyperfine coupling constants of nitroxide **5** and models including one, two and three explicit water molecules.

| Model                                             | Gibbs free energy [Eh] | A <sub>N</sub> [MHz] |
|---------------------------------------------------|------------------------|----------------------|
| <b>5</b> (carboxylic acid form)                   | -942.301962            | 37.27                |
| <b>5</b> (carboxylic acid form)+H <sub>2</sub> O  | -1018.705870           | 41.76                |
| <b>5</b> (carboxylic acid form)+2H <sub>2</sub> O | -1095.113281           | 41.76                |
| <b>5</b> (carboxylic acid form)+3H <sub>2</sub> O | -1171.519225           | 40.92                |
| <b>5</b> (carboxylate form)+H <sub>2</sub> O      | -1018.596155           | 42.06                |

**Supplementary Table S6.** Free energies of other structures considered with and without one explicit water molecule.

| Model                           | Gibbs free energy [Eh] | A <sub>N</sub> [MHz] | A <sub>H</sub> [MHz] |
|---------------------------------|------------------------|----------------------|----------------------|
| <b>A</b>                        | -862.810071            | 28.52                | 28.91                |
| <b>A</b> + H <sub>2</sub> O     | -939.236803            | 30.18                | 29.85                |
| <b>B</b>                        | -941.412933            | 47.83                | 9.92                 |
| <b>B</b> + H <sub>2</sub> O     | -1017.838986           | 40.58                | 48.23                |
| <b>C cis</b>                    | -1017.842710           | 37.34                | 13.32                |
| <b>C cis</b> + H <sub>2</sub> O | -1094.274882           | 40.08                | 5.95                 |
| <b>D</b>                        | -941.420185            | 31.48                | 15.20                |
| <b>D</b> + H <sub>2</sub> O     | -1017.845624           | 34.45                | 14.85                |
| <b>E</b>                        | -1017.855334           | 39.36                | 3.46                 |
| <b>E</b> + H <sub>2</sub> O     | -1094.286646           | 48.18                | 1.33                 |

**Supplementary Table S7.** DFT-optimized Cartesian coordinates for nitroxide **5**

|   |              |              |              |
|---|--------------|--------------|--------------|
| 6 | -3.955027000 | 1.890439000  | -1.037488000 |
| 6 | -2.776848000 | 2.540697000  | -0.636745000 |
| 6 | -1.667646000 | 1.784811000  | -0.276111000 |
| 6 | -3.994285000 | 0.486898000  | -1.095108000 |
| 6 | -1.713944000 | 0.387607000  | -0.330248000 |
| 6 | -2.873788000 | -0.267026000 | -0.745548000 |
| 6 | -0.316225000 | 2.293406000  | 0.191558000  |
| 7 | 0.391872000  | 0.990590000  | 0.392347000  |
| 6 | -0.400488000 | -0.241723000 | 0.090364000  |



|   |              |              |              |
|---|--------------|--------------|--------------|
| 8 | 1.539587000  | 0.929578000  | 0.956130000  |
| 6 | -0.496053000 | 3.051166000  | 1.539757000  |
| 6 | 0.728452000  | 3.708496000  | 2.187697000  |
| 1 | -0.945821000 | 2.344264000  | 2.248683000  |
| 1 | -1.254163000 | 3.824375000  | 1.358798000  |
| 1 | 1.538506000  | 2.989617000  | 2.330245000  |
| 1 | 0.444523000  | 4.109147000  | 3.167639000  |
| 1 | 1.104313000  | 4.545178000  | 1.590193000  |
| 6 | 0.350190000  | 3.139562000  | -0.937261000 |
| 6 | 1.879708000  | 3.270215000  | -0.947997000 |
| 1 | -0.107081000 | 4.137047000  | -0.896846000 |
| 1 | 0.044503000  | 2.704801000  | -1.896862000 |
| 1 | 2.275714000  | 3.745235000  | -0.047763000 |
| 1 | 2.174159000  | 3.883736000  | -1.807871000 |
| 1 | 2.362385000  | 2.294846000  | -1.049048000 |
| 6 | -0.633315000 | -1.092959000 | 1.373869000  |
| 6 | 0.547990000  | -1.870145000 | 1.965430000  |
| 1 | -1.434739000 | -1.801971000 | 1.130779000  |
| 1 | -1.043555000 | -0.419668000 | 2.137220000  |
| 1 | 0.876347000  | -2.677927000 | 1.303347000  |
| 1 | 0.239141000  | -2.328941000 | 2.911884000  |
| 1 | 1.397550000  | -1.212604000 | 2.160148000  |
| 6 | 0.209667000  | -1.039475000 | -1.104157000 |
| 6 | 1.729250000  | -1.254465000 | -1.136534000 |
| 1 | -0.075361000 | -0.519576000 | -2.027015000 |
| 1 | -0.302912000 | -2.009810000 | -1.130856000 |
| 1 | 1.984127000  | -1.825011000 | -2.037859000 |
| 1 | 2.101864000  | -1.809492000 | -0.272682000 |
| 1 | 2.265012000  | -0.302963000 | -1.177442000 |
| 6 | -5.117893000 | 2.744074000  | -1.419188000 |
| 8 | -6.342667000 | 2.171957000  | -1.437722000 |
| 8 | -5.018326000 | 3.922299000  | -1.712090000 |
| 1 | -2.757976000 | 3.625527000  | -0.608552000 |
| 1 | -4.882261000 | -0.034762000 | -1.440957000 |
| 1 | -2.914470000 | -1.350897000 | -0.804805000 |
| 1 | -6.322498000 | 1.272994000  | -1.065623000 |

**Supplementary Table S8.** DFT-optimized Cartesian coordinates for model 5 + H<sub>2</sub>O

|   |              |              |              |
|---|--------------|--------------|--------------|
| 6 | -4.768361000 | 1.327030000  | -1.455512000 |
| 6 | -3.729713000 | 2.031223000  | -0.826509000 |
| 6 | -2.667175000 | 1.328996000  | -0.269421000 |
| 6 | -4.712202000 | -0.074895000 | -1.537377000 |
| 6 | -2.619914000 | -0.065727000 | -0.347732000 |
| 6 | -3.637987000 | -0.773779000 | -0.987084000 |
| 6 | -1.461047000 | 1.904392000  | 0.449550000  |
| 7 | -0.711809000 | 0.638541000  | 0.749712000  |
| 6 | -1.376043000 | -0.633120000 | 0.308860000  |
| 8 | 0.245452000  | 0.619580000  | 1.601001000  |

|   |              |              |              |
|---|--------------|--------------|--------------|
| 6 | -5.883306000 | 2.125957000  | -2.044498000 |
| 8 | -7.036489000 | 1.484865000  | -2.336542000 |
| 8 | -5.804075000 | 3.319847000  | -2.273522000 |
| 1 | -3.781139000 | 3.114609000  | -0.780568000 |
| 1 | -5.483844000 | -0.638532000 | -2.054707000 |
| 1 | -3.602636000 | -1.856552000 | -1.066666000 |
| 1 | -7.032883000 | 0.571487000  | -2.001286000 |
| 6 | -0.667031000 | 2.833425000  | -0.518750000 |
| 6 | 0.824308000  | 3.072976000  | -0.250787000 |
| 1 | -1.198448000 | 3.793572000  | -0.533006000 |
| 1 | -0.764862000 | 2.417665000  | -1.528827000 |
| 1 | 1.019443000  | 3.498229000  | 0.735785000  |
| 1 | 1.206292000  | 3.777588000  | -0.999140000 |
| 1 | 1.405962000  | 2.152334000  | -0.338576000 |
| 6 | -1.933110000 | 2.598068000  | 1.762485000  |
| 6 | -0.911935000 | 3.371833000  | 2.604433000  |
| 1 | -2.407120000 | 1.826754000  | 2.382107000  |
| 1 | -2.735511000 | 3.286339000  | 1.468307000  |
| 1 | -0.063799000 | 2.743518000  | 2.884853000  |
| 1 | -1.397759000 | 3.723414000  | 3.521887000  |
| 1 | -0.534509000 | 4.253564000  | 2.077374000  |
| 6 | -1.802141000 | -1.497318000 | 1.534153000  |
| 6 | -0.737538000 | -2.291100000 | 2.300325000  |
| 1 | -2.559312000 | -2.200039000 | 1.163691000  |
| 1 | -2.325647000 | -0.829042000 | 2.229077000  |
| 1 | -0.326970000 | -3.108105000 | 1.699146000  |
| 1 | -1.199191000 | -2.741081000 | 3.186899000  |
| 1 | 0.084250000  | -1.651512000 | 2.629343000  |
| 6 | -0.523014000 | -1.381327000 | -0.759953000 |
| 6 | 0.967727000  | -1.620370000 | -0.484870000 |
| 1 | -0.606833000 | -0.815496000 | -1.695358000 |
| 1 | -1.022385000 | -2.342321000 | -0.940847000 |
| 1 | 1.403866000  | -2.131276000 | -1.351776000 |
| 1 | 1.144228000  | -2.247217000 | 0.391675000  |
| 1 | 1.515820000  | -0.686245000 | -0.342445000 |
| 8 | 3.048662000  | 0.776592000  | 1.151689000  |
| 1 | 2.088438000  | 0.808571000  | 1.331956000  |
| 1 | 3.276455000  | -0.151253000 | 1.321273000  |

**Supplementary Table S9.** DFT-optimized Cartesian coordinates for model 5 + 2H<sub>2</sub>O

|   |              |              |              |
|---|--------------|--------------|--------------|
| 6 | -4.819507000 | 1.340888000  | -1.289623000 |
| 6 | -3.719891000 | 2.051400000  | -0.783514000 |
| 6 | -2.619263000 | 1.352647000  | -0.301518000 |
| 6 | -4.786799000 | -0.063361000 | -1.329911000 |
| 6 | -2.594856000 | -0.045174000 | -0.337203000 |
| 6 | -3.674109000 | -0.759449000 | -0.857562000 |
| 6 | -1.348166000 | 1.934209000  | 0.290993000  |
| 7 | -0.603758000 | 0.666910000  | 0.579313000  |

|   |              |              |              |
|---|--------------|--------------|--------------|
| 6 | -1.303529000 | -0.607112000 | 0.224042000  |
| 8 | 0.447847000  | 0.651522000  | 1.309956000  |
| 6 | -5.977780000 | 2.134079000  | -1.797230000 |
| 8 | -7.165241000 | 1.502980000  | -1.932076000 |
| 8 | -5.904347000 | 3.313355000  | -2.093036000 |
| 1 | -3.755131000 | 3.136279000  | -0.770247000 |
| 1 | -5.609987000 | -0.630580000 | -1.755131000 |
| 1 | -3.657910000 | -1.844617000 | -0.902872000 |
| 1 | -7.140929000 | 0.608753000  | -1.548981000 |
| 6 | -0.613425000 | 2.810079000  | -0.771659000 |
| 6 | 0.909890000  | 2.959821000  | -0.665027000 |
| 1 | -1.086272000 | 3.799834000  | -0.740431000 |
| 1 | -0.841470000 | 2.395493000  | -1.760618000 |
| 1 | 1.238843000  | 3.361288000  | 0.296269000  |
| 1 | 1.252910000  | 3.645518000  | -1.448242000 |
| 1 | 1.416647000  | 2.003355000  | -0.822701000 |
| 6 | -1.696794000 | 2.694339000  | 1.605855000  |
| 6 | -0.595861000 | 3.463917000  | 2.344934000  |
| 1 | -2.159194000 | 1.971037000  | 2.289417000  |
| 1 | -2.488847000 | 3.403186000  | 1.334229000  |
| 1 | 0.209789000  | 2.810597000  | 2.687356000  |
| 1 | -1.035033000 | 3.943431000  | 3.227617000  |
| 1 | -0.166713000 | 4.258202000  | 1.726129000  |
| 6 | -1.617173000 | -1.447959000 | 1.498132000  |
| 6 | -0.482351000 | -2.221750000 | 2.179515000  |
| 1 | -2.393208000 | -2.163917000 | 1.200699000  |
| 1 | -2.088825000 | -0.774254000 | 2.224602000  |
| 1 | -0.073553000 | -3.001340000 | 1.528740000  |
| 1 | -0.880257000 | -2.719485000 | 3.071523000  |
| 1 | 0.334178000  | -1.567027000 | 2.492053000  |
| 6 | -0.532317000 | -1.390653000 | -0.883997000 |
| 6 | 0.993787000  | -1.502516000 | -0.763528000 |
| 1 | -0.761640000 | -0.917956000 | -1.846307000 |
| 1 | -0.976075000 | -2.393683000 | -0.923750000 |
| 1 | 1.369094000  | -2.100845000 | -1.601933000 |
| 1 | 1.317067000  | -1.982232000 | 0.162640000  |
| 1 | 1.472788000  | -0.521027000 | -0.815067000 |
| 8 | 3.070343000  | 1.545213000  | 1.794172000  |
| 1 | 2.220846000  | 1.335055000  | 1.356785000  |
| 1 | 3.628136000  | 0.770161000  | 1.613465000  |
| 8 | 1.482180000  | 0.739551000  | 3.998299000  |
| 1 | 2.210338000  | 1.046151000  | 3.416036000  |
| 1 | 0.771498000  | 0.603605000  | 3.348865000  |

**Supplementary Table S10.** DFT-optimized Cartesian coordinates for model 5 + 3H<sub>2</sub>O

|   |              |             |              |
|---|--------------|-------------|--------------|
| 6 | -4.766622000 | 1.014289000 | -1.203814000 |
| 6 | -3.790085000 | 1.884066000 | -0.693151000 |
| 6 | -2.580539000 | 1.365556000 | -0.246083000 |

|   |              |              |              |
|---|--------------|--------------|--------------|
| 6 | -4.503943000 | -0.363718000 | -1.281545000 |
| 6 | -2.326311000 | -0.007550000 | -0.322271000 |
| 6 | -3.282784000 | -0.877654000 | -0.844760000 |
| 6 | -1.403422000 | 2.134174000  | 0.326327000  |
| 7 | -0.479805000 | 0.993996000  | 0.620857000  |
| 6 | -0.945334000 | -0.364085000 | 0.198442000  |
| 8 | 0.581085000  | 1.176534000  | 1.318148000  |
| 6 | -6.046480000 | 1.619565000  | -1.677863000 |
| 8 | -7.113274000 | 0.804555000  | -1.831394000 |
| 8 | -6.173573000 | 2.804352000  | -1.930570000 |
| 1 | -4.003143000 | 2.947268000  | -0.652308000 |
| 1 | -5.229001000 | -1.050322000 | -1.709390000 |
| 1 | -3.089361000 | -1.943354000 | -0.921436000 |
| 1 | -6.934633000 | -0.087878000 | -1.486724000 |
| 6 | -0.809081000 | 3.078946000  | -0.766373000 |
| 6 | 0.673003000  | 3.464484000  | -0.667093000 |
| 1 | -1.429942000 | 3.983616000  | -0.767672000 |
| 1 | -0.968071000 | 2.600527000  | -1.740168000 |
| 1 | 0.925190000  | 3.963213000  | 0.270827000  |
| 1 | 0.912921000  | 4.150016000  | -1.488557000 |
| 1 | 1.321049000  | 2.589186000  | -0.764333000 |
| 6 | -1.830351000 | 2.862348000  | 1.635110000  |
| 6 | -0.861937000 | 3.857399000  | 2.286493000  |
| 1 | -2.109640000 | 2.089637000  | 2.361775000  |
| 1 | -2.756338000 | 3.399351000  | 1.393052000  |
| 1 | 0.090224000  | 3.397051000  | 2.559828000  |
| 1 | -1.321273000 | 4.249641000  | 3.200967000  |
| 1 | -0.657025000 | 4.710748000  | 1.632930000  |
| 6 | -1.108730000 | -1.330645000 | 1.409856000  |
| 6 | 0.106697000  | -1.745817000 | 2.248017000  |
| 1 | -1.573625000 | -2.233725000 | 0.995168000  |
| 1 | -1.856892000 | -0.885736000 | 2.077861000  |
| 1 | 0.907442000  | -2.192757000 | 1.653698000  |
| 1 | -0.218814000 | -2.499423000 | 2.975528000  |
| 1 | 0.522659000  | -0.908069000 | 2.812373000  |
| 6 | -0.090364000 | -0.924612000 | -0.983992000 |
| 6 | 1.439203000  | -0.861804000 | -0.902567000 |
| 1 | -0.398306000 | -0.382474000 | -1.885595000 |
| 1 | -0.410206000 | -1.964141000 | -1.130890000 |
| 1 | 1.850470000  | -1.230965000 | -1.849631000 |
| 1 | 1.865894000  | -1.472266000 | -0.104699000 |
| 1 | 1.792339000  | 0.165727000  | -0.775216000 |
| 8 | 3.076186000  | 0.198384000  | 2.096560000  |
| 1 | 3.728067000  | 0.821923000  | 1.733751000  |
| 1 | 2.247094000  | 0.383140000  | 1.603814000  |
| 8 | 1.370269000  | 1.315266000  | 4.100253000  |
| 1 | 2.162477000  | 0.967053000  | 3.643460000  |
| 1 | 0.747551000  | 1.397906000  | 3.357544000  |

|   |             |              |             |
|---|-------------|--------------|-------------|
| 8 | 3.615272000 | -2.501225000 | 1.499193000 |
| 1 | 3.229278000 | -2.959749000 | 2.261863000 |
| 1 | 3.494315000 | -1.551085000 | 1.719221000 |

**Supplementary Table S11.** DFT-optimized Cartesian coordinates for model 5 (carboxylate form)  
+ H<sub>2</sub>O

|   |              |              |              |
|---|--------------|--------------|--------------|
| 6 | -4.775786000 | 1.339695000  | -1.464412000 |
| 6 | -3.740368000 | 2.031569000  | -0.822906000 |
| 6 | -2.671917000 | 1.328456000  | -0.267773000 |
| 6 | -4.716713000 | -0.060615000 | -1.534672000 |
| 6 | -2.623710000 | -0.065226000 | -0.344208000 |
| 6 | -3.649061000 | -0.769187000 | -0.980105000 |
| 6 | -1.461702000 | 1.903252000  | 0.447116000  |
| 7 | -0.711293000 | 0.638543000  | 0.749028000  |
| 6 | -1.377574000 | -0.633107000 | 0.310765000  |
| 8 | 0.249297000  | 0.620636000  | 1.598533000  |
| 6 | -5.952357000 | 2.102879000  | -2.082660000 |
| 8 | -6.843203000 | 1.409387000  | -2.646959000 |
| 8 | -5.929486000 | 3.360385000  | -1.975427000 |
| 1 | -3.799194000 | 3.115203000  | -0.773412000 |
| 1 | -5.527367000 | -0.581335000 | -2.034511000 |
| 1 | -3.620683000 | -1.854678000 | -1.046081000 |
| 6 | -0.666141000 | 2.829648000  | -0.522059000 |
| 6 | 0.826107000  | 3.069054000  | -0.257672000 |
| 1 | -1.196696000 | 3.790376000  | -0.538913000 |
| 1 | -0.766181000 | 2.411625000  | -1.531047000 |
| 1 | 1.023643000  | 3.496705000  | 0.727530000  |
| 1 | 1.209582000  | 3.770616000  | -1.008479000 |
| 1 | 1.405840000  | 2.146847000  | -0.342402000 |
| 6 | -1.925947000 | 2.601167000  | 1.760251000  |
| 6 | -0.902177000 | 3.374541000  | 2.599886000  |
| 1 | -2.400516000 | 1.832137000  | 2.382575000  |
| 1 | -2.728080000 | 3.289864000  | 1.466315000  |
| 1 | -0.053746000 | 2.745276000  | 2.877565000  |
| 1 | -1.383923000 | 3.728010000  | 3.519043000  |
| 1 | -0.524436000 | 4.255556000  | 2.071482000  |
| 6 | -1.795934000 | -1.495517000 | 1.539422000  |
| 6 | -0.730230000 | -2.288291000 | 2.305723000  |
| 1 | -2.554857000 | -2.198512000 | 1.172860000  |
| 1 | -2.317960000 | -0.826046000 | 2.234575000  |
| 1 | -0.321620000 | -3.107700000 | 1.706129000  |
| 1 | -1.188012000 | -2.735461000 | 3.195990000  |
| 1 | 0.093501000  | -1.648157000 | 2.629100000  |
| 6 | -0.523242000 | -1.383409000 | -0.755039000 |
| 6 | 0.967894000  | -1.624578000 | -0.482658000 |
| 1 | -0.607741000 | -0.818385000 | -1.690918000 |
| 1 | -1.023555000 | -2.344168000 | -0.936041000 |
| 1 | 1.404335000  | -2.136563000 | -1.349069000 |

|   |             |              |              |
|---|-------------|--------------|--------------|
| 1 | 1.145561000 | -2.250461000 | 0.394540000  |
| 1 | 1.516082000 | -0.690376000 | -0.340725000 |
| 8 | 3.046656000 | 0.770435000  | 1.152136000  |
| 1 | 2.085452000 | 0.801382000  | 1.330633000  |
| 1 | 3.274209000 | -0.157370000 | 1.322212000  |

**Supplementary Table S12.** DFT-optimized Cartesian coordinates for structure **C trans**

|   |              |              |              |
|---|--------------|--------------|--------------|
| 6 | -4.164366000 | 2.009902000  | -0.401543000 |
| 6 | -3.107455000 | 2.917246000  | -0.274984000 |
| 6 | -1.936495000 | 2.603167000  | 0.421946000  |
| 6 | -4.043236000 | 0.747467000  | 0.187531000  |
| 6 | -1.802547000 | 1.314119000  | 0.986183000  |
| 6 | -2.874244000 | 0.415631000  | 0.865088000  |
| 1 | -3.231462000 | 3.894039000  | -0.725759000 |
| 1 | -2.817716000 | -0.570932000 | 1.306118000  |
| 1 | -4.825443000 | -0.002225000 | 0.107419000  |
| 6 | -5.362021000 | 2.443079000  | -1.180953000 |
| 8 | -5.363781000 | 3.406730000  | -1.926161000 |
| 8 | -6.496646000 | 1.722728000  | -1.049518000 |
| 1 | -6.414836000 | 1.046172000  | -0.354818000 |
| 6 | -0.915256000 | 3.724129000  | 0.649211000  |
| 6 | -0.528353000 | 0.958798000  | 1.774543000  |
| 7 | 0.391797000  | 3.156145000  | 1.082112000  |
| 6 | 0.664744000  | 1.701405000  | 1.119843000  |
| 6 | -0.218000000 | -0.572799000 | 1.815177000  |
| 6 | 0.340620000  | -1.090954000 | 3.148756000  |
| 1 | 0.481784000  | -0.802542000 | 1.002567000  |
| 1 | -1.111172000 | -1.157662000 | 1.592572000  |
| 1 | 1.256215000  | -0.578928000 | 3.454032000  |
| 1 | 0.565909000  | -2.159149000 | 3.053566000  |
| 1 | -0.389318000 | -0.975037000 | 3.956469000  |
| 8 | -0.657838000 | 1.510411000  | 3.098124000  |
| 1 | -1.475406000 | 1.159073000  | 3.488509000  |
| 8 | 1.387846000  | 3.966807000  | 1.140314000  |
| 6 | 2.019697000  | 1.462260000  | 1.785818000  |
| 1 | 0.717149000  | 1.341644000  | 0.080798000  |
| 1 | 2.787646000  | 2.045309000  | 1.277274000  |
| 1 | 2.290441000  | 0.406857000  | 1.717665000  |
| 1 | 1.998274000  | 1.759387000  | 2.837974000  |
| 6 | -1.494177000 | 4.605263000  | 1.811218000  |
| 6 | -0.700865000 | 5.848487000  | 2.229709000  |
| 1 | -1.621642000 | 3.944247000  | 2.675036000  |
| 1 | -2.498939000 | 4.914338000  | 1.498421000  |
| 1 | 0.299365000  | 5.590748000  | 2.583913000  |
| 1 | -1.235496000 | 6.354188000  | 3.043007000  |
| 1 | -0.595005000 | 6.565743000  | 1.408690000  |
| 6 | -0.660604000 | 4.575000000  | -0.624879000 |
| 6 | -0.165079000 | 3.787878000  | -1.842036000 |

|   |              |             |              |
|---|--------------|-------------|--------------|
| 1 | 0.083803000  | 5.326984000 | -0.357097000 |
| 1 | -1.576443000 | 5.121933000 | -0.873600000 |
| 1 | 0.783189000  | 3.282642000 | -1.625785000 |
| 1 | 0.008113000  | 4.467000000 | -2.684235000 |
| 1 | -0.887781000 | 3.030933000 | -2.165203000 |

**Supplementary Table S13.** DFT-optimized Cartesian coordinates for model **C** *trans* + H<sub>2</sub>O

|   |              |              |              |
|---|--------------|--------------|--------------|
| 6 | -4.258092000 | 1.992211000  | -0.240969000 |
| 6 | -3.173518000 | 2.872650000  | -0.274109000 |
| 6 | -1.969059000 | 2.589190000  | 0.380818000  |
| 6 | -4.138626000 | 0.798339000  | 0.481081000  |
| 6 | -1.822117000 | 1.345584000  | 1.034386000  |
| 6 | -2.933135000 | 0.489495000  | 1.099320000  |
| 1 | -3.300826000 | 3.805153000  | -0.811030000 |
| 1 | -2.867782000 | -0.445130000 | 1.643048000  |
| 1 | -4.952593000 | 0.081444000  | 0.543526000  |
| 6 | -5.488371000 | 2.378340000  | -0.993786000 |
| 8 | -5.502249000 | 3.237742000  | -1.856770000 |
| 8 | -6.638305000 | 1.735054000  | -0.698816000 |
| 1 | -6.537725000 | 1.155171000  | 0.076218000  |
| 6 | -0.936632000 | 3.719553000  | 0.492870000  |
| 6 | -0.487157000 | 0.956743000  | 1.701763000  |
| 7 | 0.348248000  | 3.174592000  | 1.010367000  |
| 6 | 0.651475000  | 1.722598000  | 0.972588000  |
| 6 | -0.193129000 | -0.573358000 | 1.624699000  |
| 6 | 0.456528000  | -1.190441000 | 2.872096000  |
| 1 | 0.443294000  | -0.749378000 | 0.749422000  |
| 1 | -1.110093000 | -1.128178000 | 1.423574000  |
| 1 | 1.400303000  | -0.709708000 | 3.141975000  |
| 1 | 0.660482000  | -2.249985000 | 2.680767000  |
| 1 | -0.210445000 | -1.123359000 | 3.736171000  |
| 8 | -0.533589000 | 1.316381000  | 3.090254000  |
| 1 | -0.612619000 | 2.283940000  | 3.150882000  |
| 8 | 1.320737000  | 4.010552000  | 1.129937000  |
| 6 | 2.055798000  | 1.473903000  | 1.514833000  |
| 1 | 0.615274000  | 1.410801000  | -0.081090000 |
| 1 | 2.784010000  | 2.055204000  | 0.947472000  |
| 1 | 2.309326000  | 0.417304000  | 1.410961000  |
| 1 | 2.131213000  | 1.758088000  | 2.567985000  |
| 6 | -1.530349000 | 4.719977000  | 1.548448000  |
| 6 | -0.721118000 | 5.961791000  | 1.943939000  |
| 1 | -1.768815000 | 4.143696000  | 2.452521000  |
| 1 | -2.494770000 | 5.043413000  | 1.141160000  |
| 1 | 0.171703000  | 5.707817000  | 2.518658000  |
| 1 | -1.355847000 | 6.600936000  | 2.570504000  |
| 1 | -0.416232000 | 6.552720000  | 1.074879000  |
| 6 | -0.655590000 | 4.437513000  | -0.854500000 |
| 6 | -0.148868000 | 3.538761000  | -1.986805000 |

|   |              |             |              |
|---|--------------|-------------|--------------|
| 1 | 0.082234000  | 5.218314000 | -0.654403000 |
| 1 | -1.571339000 | 4.950721000 | -1.166207000 |
| 1 | 0.823503000  | 3.096046000 | -1.743768000 |
| 1 | -0.018506000 | 4.128794000 | -2.900560000 |
| 1 | -0.849995000 | 2.727272000 | -2.209529000 |
| 8 | 1.999239000  | 4.157700000 | 3.885862000  |
| 1 | 2.859078000  | 4.601514000 | 3.964188000  |
| 1 | 1.864164000  | 4.093580000 | 2.919616000  |

**Supplementary Table S14.** DFT-optimized Cartesian coordinates for model **C** *trans* (carboxylate form) + H<sub>2</sub>O

|   |              |              |              |
|---|--------------|--------------|--------------|
| 6 | -4.268051000 | 2.000976000  | -0.257390000 |
| 6 | -3.186728000 | 2.881935000  | -0.256339000 |
| 6 | -1.973897000 | 2.586738000  | 0.385810000  |
| 6 | -4.133492000 | 0.793777000  | 0.435229000  |
| 6 | -1.822034000 | 1.334620000  | 1.021245000  |
| 6 | -2.932392000 | 0.472475000  | 1.058313000  |
| 1 | -3.328697000 | 3.828495000  | -0.766022000 |
| 1 | -2.866716000 | -0.470755000 | 1.589685000  |
| 1 | -4.977857000 | 0.112520000  | 0.470657000  |
| 6 | -5.572148000 | 2.364422000  | -0.975168000 |
| 8 | -5.602952000 | 3.482076000  | -1.560874000 |
| 8 | -6.500398000 | 1.511832000  | -0.921254000 |
| 6 | -0.937825000 | 3.714453000  | 0.500888000  |
| 6 | -0.494784000 | 0.948976000  | 1.700715000  |
| 7 | 0.347629000  | 3.169658000  | 1.018494000  |
| 6 | 0.651429000  | 1.718170000  | 0.985036000  |
| 6 | -0.192563000 | -0.579553000 | 1.630922000  |
| 6 | 0.451283000  | -1.193898000 | 2.883055000  |
| 1 | 0.449162000  | -0.757081000 | 0.759462000  |
| 1 | -1.107764000 | -1.136391000 | 1.427560000  |
| 1 | 1.392820000  | -0.711813000 | 3.158592000  |
| 1 | 0.657797000  | -2.253996000 | 2.696480000  |
| 1 | -0.221195000 | -1.125423000 | 3.742867000  |
| 8 | -0.544144000 | 1.307770000  | 3.092952000  |
| 1 | -0.716463000 | 2.262849000  | 3.146730000  |
| 8 | 1.322264000  | 4.004879000  | 1.135880000  |
| 6 | 2.051365000  | 1.472329000  | 1.540353000  |
| 1 | 0.626927000  | 1.406618000  | -0.069155000 |
| 1 | 2.785303000  | 2.052492000  | 0.979008000  |
| 1 | 2.306789000  | 0.415567000  | 1.441765000  |
| 1 | 2.116769000  | 1.759016000  | 2.593566000  |
| 6 | -1.522918000 | 4.724952000  | 1.550884000  |
| 6 | -0.711649000 | 5.968631000  | 1.937517000  |
| 1 | -1.763550000 | 4.156766000  | 2.459904000  |
| 1 | -2.487541000 | 5.047316000  | 1.143908000  |
| 1 | 0.185388000  | 5.718725000  | 2.507633000  |
| 1 | -1.342205000 | 6.612181000  | 2.564150000  |



|   |             |            |             |
|---|-------------|------------|-------------|
| 1 | -0.41156000 | 6.55514300 | 1.06360300  |
| 6 | -0.65293300 | 4.42789000 | -0.84905900 |
| 6 | -0.14620900 | 3.52362800 | -1.97694300 |
| 1 | 0.08488500  | 5.21041700 | -0.65443200 |
| 1 | -1.57015000 | 4.93582400 | -1.16442400 |
| 1 | 0.82682800  | 3.08291500 | -1.73239000 |
| 1 | -0.01732200 | 4.10736200 | -2.89522900 |
| 1 | -0.84771900 | 2.71050000 | -2.19153000 |
| 8 | 2.08083300  | 4.22533700 | 3.85810700  |
| 1 | 2.94755800  | 4.66241400 | 3.85743500  |
| 1 | 1.88458700  | 4.11169300 | 2.90628100  |

**Supplementary Table S15.** DFT-optimized Cartesian coordinates for structure **A**

|   |              |              |              |
|---|--------------|--------------|--------------|
| 6 | -4.374184165 | 1.217079228  | -0.722747675 |
| 6 | -3.106271758 | 1.781922984  | -0.494836354 |
| 6 | -2.048826806 | 0.961222139  | -0.134044169 |
| 6 | -4.548176108 | -0.172784228 | -0.627908283 |
| 6 | -2.228619686 | -0.434897600 | -0.042002583 |
| 6 | -3.479722664 | -1.005584421 | -0.297507297 |
| 6 | -0.610083006 | 1.345194446  | 0.155277498  |
| 7 | -0.019284366 | -0.019372993 | 0.390980048  |
| 6 | -0.954774397 | -1.065482425 | 0.307162017  |
| 8 | 1.198232832  | -0.179543312 | 0.732966934  |
| 6 | -0.420492549 | 2.142923853  | 1.472575007  |
| 6 | -0.912083197 | 3.593069846  | 1.462274800  |
| 1 | 0.648399659  | 2.113460693  | 1.708751476  |
| 1 | -0.931223167 | 1.590283064  | 2.270536819  |
| 1 | -0.419946088 | 4.192484503  | 0.689714995  |
| 1 | -0.691925268 | 4.057226047  | 2.430443629  |
| 1 | -1.994134746 | 3.659680164  | 1.307798797  |
| 6 | 0.037313331  | 2.009234461  | -1.089632933 |
| 6 | 1.513076895  | 2.407417988  | -0.974193672 |
| 1 | -0.561886137 | 2.897395330  | -1.326302055 |
| 1 | -0.094247316 | 1.322112893  | -1.934238430 |
| 1 | 1.675717633  | 3.156701018  | -0.191603100 |
| 1 | 1.846455192  | 2.842320141  | -1.923299152 |
| 1 | 2.142528208  | 1.543016642  | -0.751120004 |
| 6 | -0.597838875 | -2.357857910 | 0.542468720  |
| 6 | -1.506677916 | -3.551397056 | 0.504418179  |
| 1 | -2.396642941 | -3.416341570 | 1.132083918  |
| 1 | -0.979711390 | -4.440635827 | 0.860299786  |
| 1 | -1.863030808 | -3.765111965 | -0.512890277 |
| 1 | -2.987335184 | 2.853534860  | -0.608942369 |
| 1 | -5.507631167 | -0.632540395 | -0.847220733 |
| 1 | -3.631680195 | -2.077215178 | -0.255040785 |
| 6 | -5.480468936 | 2.143920059  | -1.100398998 |

|   |              |              |              |
|---|--------------|--------------|--------------|
| 8 | -6.750290428 | 1.697989055  | -0.977689636 |
| 8 | -5.294996435 | 3.275823425  | -1.511266633 |
| 1 | -6.786530154 | 0.835257339  | -0.529066138 |
| 1 | 0.449291100  | -2.517553296 | 0.782507655  |

**Supplementary Table S16.** DFT-optimized Cartesian coordinates for model A + H<sub>2</sub>O

|   |              |              |              |
|---|--------------|--------------|--------------|
| 6 | -4.400046441 | 1.250196411  | -0.869393918 |
| 6 | -3.154797760 | 1.867800123  | -0.657679385 |
| 6 | -2.090561888 | 1.112338939  | -0.189627702 |
| 6 | -4.543770242 | -0.128367414 | -0.647596544 |
| 6 | -2.237014296 | -0.273360536 | 0.023067151  |
| 6 | -3.465954450 | -0.898324565 | -0.211902849 |
| 6 | -0.675127674 | 1.561982338  | 0.114000133  |
| 7 | -0.058362779 | 0.241268255  | 0.490542389  |
| 6 | -0.957756045 | -0.836354824 | 0.464161326  |
| 8 | 1.159835894  | 0.173124755  | 0.875076827  |
| 6 | -0.558669641 | 2.476304929  | 1.362948984  |
| 6 | -1.092464577 | 3.903188052  | 1.204813380  |
| 1 | 0.500402647  | 2.503512235  | 1.638869927  |
| 1 | -1.083829474 | 1.979845267  | 2.187946194  |
| 1 | -0.590709833 | 4.445848826  | 0.397204652  |
| 1 | -0.919955435 | 4.458760672  | 2.133579160  |
| 1 | -2.169653201 | 3.920678469  | 1.010542095  |
| 6 | -0.000105901 | 2.136878218  | -1.160964089 |
| 6 | 1.454256062  | 2.604041718  | -1.030350634 |
| 1 | -0.622437396 | 2.976292684  | -1.494507127 |
| 1 | -0.074236760 | 1.373806570  | -1.945303880 |
| 1 | 1.560932068  | 3.416584739  | -0.303203376 |
| 1 | 1.800440518  | 2.980170051  | -1.999539588 |
| 1 | 2.110934252  | 1.786884539  | -0.723998134 |
| 6 | -0.586465351 | -2.102520555 | 0.806775330  |
| 6 | -1.482865953 | -3.306326438 | 0.822632111  |
| 1 | -2.369449499 | -3.155129614 | 1.452065462  |
| 1 | -0.943334155 | -4.174043232 | 1.210810167  |
| 1 | -1.844459286 | -3.563418947 | -0.182299560 |
| 1 | -3.057607489 | 2.926803766  | -0.867123722 |
| 1 | -5.485553472 | -0.631526207 | -0.847790695 |
| 1 | -3.596054639 | -1.963774863 | -0.070990156 |
| 6 | -5.517061905 | 2.107728189  | -1.362764022 |
| 8 | -6.778951753 | 1.646409664  | -1.218989935 |
| 8 | -5.346160041 | 3.194980327  | -1.884916868 |
| 1 | -6.805542167 | 0.835120700  | -0.681824626 |
| 1 | 0.448314892  | -2.244308880 | 1.101850573  |
| 8 | 2.609045829  | -1.925679091 | 2.163879755  |
| 1 | 2.123751054  | -1.192019609 | 1.734463751  |

1 2.161276290 -2.012505658 3.020557439

**Supplementary Table S17.** DFT-optimized Cartesian coordinates for structure **B**

|   |              |              |              |
|---|--------------|--------------|--------------|
| 6 | -4.079019541 | 1.613899987  | -0.789305467 |
| 6 | -2.830763164 | 2.173718889  | -0.491869040 |
| 6 | -1.722183211 | 1.385114154  | -0.172962458 |
| 6 | -4.210232076 | 0.218305270  | -0.814067599 |
| 6 | -1.862329235 | -0.027018845 | -0.181592532 |
| 6 | -3.110607469 | -0.579805154 | -0.528453040 |
| 1 | -2.748517029 | 3.254964902  | -0.511744880 |
| 1 | -5.141555189 | -0.261810424 | -1.101027802 |
| 1 | -3.208989946 | -1.655540349 | -0.614684647 |
| 6 | -0.381147820 | 2.088870713  | 0.144871329  |
| 7 | 0.643231548  | 1.047209882  | 0.461886871  |
| 6 | 0.606368213  | -0.195973777 | -0.357982005 |
| 6 | -0.683569232 | -0.890429976 | 0.064215130  |
| 8 | 1.137667368  | 0.960728015  | 1.642688905  |
| 6 | -0.580731369 | 3.005282011  | 1.382301278  |
| 6 | 0.551552296  | 3.965572420  | 1.766078059  |
| 1 | -0.811320682 | 2.356048037  | 2.233091363  |
| 1 | -1.480194205 | 3.598681660  | 1.191318716  |
| 1 | 1.486701305  | 3.432966073  | 1.952539446  |
| 1 | 0.273102546  | 4.494241837  | 2.685509910  |
| 1 | 0.725705422  | 4.724046229  | 0.996219329  |
| 6 | 0.074766195  | 2.874550324  | -1.136517044 |
| 6 | 1.581504324  | 3.116411958  | -1.299840545 |
| 1 | -0.456653568 | 3.833163284  | -1.131978549 |
| 1 | -0.284816855 | 2.340093555  | -2.023040975 |
| 1 | 2.020292569  | 3.649250706  | -0.452901786 |
| 1 | 1.753306902  | 3.717857470  | -2.200261780 |
| 1 | 2.128697449  | 2.175887063  | -1.421882134 |
| 6 | -0.687433734 | -2.096258370 | 0.663853685  |
| 6 | -1.832768154 | -2.835134765 | 1.298532888  |
| 1 | -2.682668838 | -2.188578982 | 1.532000002  |
| 1 | -1.492529748 | -3.306605502 | 2.228059818  |
| 1 | -2.194175010 | -3.647410518 | 0.651873912  |
| 1 | 0.268265462  | -2.609508317 | 0.739207890  |
| 1 | 0.502309470  | 0.135882781  | -1.397841071 |
| 6 | 1.907921683  | -0.973809456 | -0.218040142 |
| 1 | 1.879701290  | -1.864194087 | -0.852120594 |
| 1 | 2.083946038  | -1.276691877 | 0.815657717  |
| 1 | 2.746626922  | -0.348999303 | -0.541417806 |
| 6 | -5.199279602 | 2.544072064  | -1.109739891 |
| 8 | -6.458087352 | 2.052294465  | -1.068531923 |
| 8 | -5.039269538 | 3.715569954  | -1.404384257 |

1 -6.477451436 1.148561997 -0.708132283

**Supplementary Table S18.** DFT-optimized Cartesian coordinates for model B + H<sub>2</sub>O

|   |              |              |              |
|---|--------------|--------------|--------------|
| 6 | -4.037676122 | 1.622891531  | -0.862747936 |
| 6 | -2.780154479 | 2.168143091  | -0.582303993 |
| 6 | -1.683321546 | 1.366605674  | -0.253291655 |
| 6 | -4.195288000 | 0.229604781  | -0.850940764 |
| 6 | -1.854236553 | -0.037905193 | -0.212662919 |
| 6 | -3.111673355 | -0.580577278 | -0.540234573 |
| 1 | -2.680722916 | 3.247455175  | -0.616408785 |
| 1 | -5.135676843 | -0.240125826 | -1.125048096 |
| 1 | -3.229831204 | -1.656757487 | -0.588843130 |
| 6 | -0.344764303 | 2.061616050  | 0.071510888  |
| 7 | 0.707230676  | 1.025559481  | 0.243237049  |
| 6 | 0.600813248  | -0.281360342 | -0.461692148 |
| 6 | -0.689239134 | -0.908362778 | 0.062400083  |
| 8 | 1.681039361  | 1.236543309  | 1.053192110  |
| 6 | -0.524160662 | 2.829518166  | 1.422429384  |
| 6 | 0.453496548  | 3.954464464  | 1.781313625  |
| 1 | -0.523653406 | 2.075075552  | 2.218400971  |
| 1 | -1.531689733 | 3.257228054  | 1.404450261  |
| 1 | 1.481708415  | 3.595815868  | 1.844471870  |
| 1 | 0.171376288  | 4.365129185  | 2.758081502  |
| 1 | 0.409624855  | 4.777453779  | 1.059797813  |
| 6 | 0.050440346  | 2.978114031  | -1.141032297 |
| 6 | 1.535307875  | 3.331942764  | -1.290835150 |
| 1 | -0.541746741 | 3.897504430  | -1.067899358 |
| 1 | -0.276616756 | 2.477069941  | -2.059693267 |
| 1 | 1.930710213  | 3.880016311  | -0.433052050 |
| 1 | 1.662187155  | 3.960057951  | -2.180244654 |
| 1 | 2.148770922  | 2.435690944  | -1.427826659 |
| 6 | -0.709505648 | -2.083573498 | 0.722894212  |
| 6 | -1.867910326 | -2.762670195 | 1.400858440  |
| 1 | -2.700889808 | -2.085606478 | 1.605601552  |
| 1 | -1.533840992 | -3.198274875 | 2.349638201  |
| 1 | -2.248988545 | -3.595384600 | 0.793157551  |
| 1 | 0.231069213  | -2.624132009 | 0.800395359  |
| 1 | 0.458963865  | -0.046481436 | -1.526249072 |
| 6 | 1.881986438  | -1.088090517 | -0.303135231 |
| 1 | 1.794308890  | -2.017280002 | -0.872297391 |
| 1 | 2.082906097  | -1.327980001 | 0.743425284  |
| 1 | 2.730594000  | -0.521279159 | -0.694271015 |
| 6 | -5.142813689 | 2.565758699  | -1.202910749 |
| 8 | -6.409410124 | 2.098043108  | -1.146267600 |
| 8 | -4.961058152 | 3.726047828  | -1.526607264 |

|   |              |              |              |
|---|--------------|--------------|--------------|
| 1 | -6.444802258 | 1.203218244  | -0.765608607 |
| 8 | 0.908426009  | -0.380085095 | 3.246356019  |
| 1 | 1.310119704  | 0.233495515  | 2.598651856  |
| 1 | 0.167831178  | -0.761457158 | 2.747850335  |

**Supplementary Table S19.** DFT-optimized Cartesian coordinates for structure **C cis**

|   |              |              |              |
|---|--------------|--------------|--------------|
| 6 | -4.119160656 | 2.946629402  | -1.195913054 |
| 6 | -3.067634165 | 3.799780960  | -0.851862249 |
| 6 | -1.813568165 | 3.314812096  | -0.458390697 |
| 6 | -3.913881733 | 1.561146650  | -1.149136875 |
| 6 | -1.594325501 | 1.920442216  | -0.474449704 |
| 6 | -2.664180283 | 1.068781939  | -0.795414509 |
| 1 | -3.258878561 | 4.866560048  | -0.879384767 |
| 1 | -4.695722678 | 0.856066034  | -1.417116020 |
| 1 | -2.519854653 | -0.005253055 | -0.773108972 |
| 6 | -5.411336580 | 3.570704254  | -1.607908491 |
| 8 | -6.516962297 | 2.794503890  | -1.600877340 |
| 8 | -5.515309035 | 4.735816534  | -1.947467044 |
| 6 | -0.773202721 | 4.342911569  | 0.036233632  |
| 7 | 0.493907029  | 3.624698891  | 0.332875735  |
| 6 | 0.878040007  | 2.373045851  | -0.355121867 |
| 6 | -0.235917016 | 1.336334123  | -0.077631672 |
| 8 | 1.410121110  | 4.226928914  | 1.006795281  |
| 6 | -1.336029778 | 4.931928567  | 1.376791961  |
| 6 | -0.708290666 | 6.196320196  | 1.975765453  |
| 1 | -1.304952713 | 4.122770056  | 2.118083918  |
| 1 | -2.397250002 | 5.137190057  | 1.204146321  |
| 1 | 0.355472157  | 6.065140931  | 2.178208406  |
| 1 | -1.216595421 | 6.426182349  | 2.919764682  |
| 1 | -0.838934296 | 7.062805186  | 1.319192574  |
| 6 | -0.557785610 | 5.432977570  | -1.072144125 |
| 6 | 0.732093152  | 6.262863352  | -1.037895159 |
| 1 | -1.417379022 | 6.112450806  | -1.025586072 |
| 1 | -0.619798667 | 4.936878762  | -2.046947731 |
| 1 | 1.622897558  | 5.635928610  | -1.131180464 |
| 1 | 0.836610970  | 6.851789951  | -0.124967078 |
| 1 | 0.722397573  | 6.956407776  | -1.887391518 |
| 8 | -0.253395060 | 1.086561082  | 1.348266629  |
| 6 | 0.080341729  | -0.064378766 | -0.656960241 |
| 6 | -0.063032878 | -0.332531980 | -2.162371594 |
| 1 | -0.563308747 | -0.764256977 | -0.111547341 |
| 1 | 1.103214215  | -0.302276785 | -0.340005452 |
| 1 | -1.041330148 | -0.032893704 | -2.549206762 |
| 1 | 0.044601441  | -1.408723266 | -2.338817705 |
| 1 | 0.698668887  | 0.171365708  | -2.759707073 |

|   |              |             |              |
|---|--------------|-------------|--------------|
| 6 | 1.267587540  | 2.625333642 | -1.818894384 |
| 1 | 1.763236799  | 2.043264717 | 0.193863757  |
| 1 | 0.399697712  | 2.790395284 | -2.464451924 |
| 1 | 1.833768916  | 1.777283245 | -2.209761052 |
| 1 | 1.916352444  | 3.504724108 | -1.873408010 |
| 1 | -6.340050649 | 1.921323882 | -1.209373755 |
| 1 | -0.268521537 | 1.948115323 | 1.800502352  |

**Supplementary Table S20.** DFT-optimized Cartesian coordinates for model **C** *cis* + H<sub>2</sub>O

|   |              |              |              |
|---|--------------|--------------|--------------|
| 6 | -4.090101980 | 2.883713470  | -0.976745449 |
| 6 | -3.039961547 | 3.788168002  | -0.804999220 |
| 6 | -1.742786057 | 3.369579550  | -0.477069235 |
| 6 | -3.839910060 | 1.513405443  | -0.815607988 |
| 6 | -1.478386740 | 1.987103129  | -0.402244892 |
| 6 | -2.548904149 | 1.086006440  | -0.538232332 |
| 1 | -3.266236361 | 4.843234196  | -0.912020869 |
| 1 | -4.621152224 | 0.768775651  | -0.939936856 |
| 1 | -2.365915845 | 0.022521935  | -0.431801139 |
| 6 | -5.429946510 | 3.437929466  | -1.330697605 |
| 8 | -6.508437936 | 2.643388505  | -1.155324610 |
| 8 | -5.596798963 | 4.563169375  | -1.766635454 |
| 6 | -0.707897465 | 4.460866698  | -0.135177729 |
| 7 | 0.593016816  | 3.801452191  | 0.141265479  |
| 6 | 0.994033634  | 2.513582383  | -0.463162408 |
| 6 | -0.073924200 | 1.443483885  | -0.118091993 |
| 8 | 1.496018996  | 4.453300041  | 0.791451316  |
| 6 | -1.210337764 | 5.148723753  | 1.184076284  |
| 6 | -0.625428009 | 6.500742883  | 1.611703999  |
| 1 | -1.080424251 | 4.421844112  | 1.993529503  |
| 1 | -2.290206778 | 5.281439198  | 1.068081806  |
| 1 | 0.454763163  | 6.452190043  | 1.758296226  |
| 1 | -1.090267232 | 6.795819133  | 2.559980358  |
| 1 | -0.847991379 | 7.288630402  | 0.884562556  |
| 6 | -0.580503283 | 5.459942247  | -1.338454663 |
| 6 | 0.686632645  | 6.319976356  | -1.432314585 |
| 1 | -1.455602303 | 6.119805382  | -1.299871605 |
| 1 | -0.676914527 | 4.885264642  | -2.266277148 |
| 1 | 1.588736569  | 5.709509013  | -1.525197257 |
| 1 | 0.819686774  | 6.977429741  | -0.571213907 |
| 1 | 0.616752928  | 6.947903509  | -2.328313121 |
| 8 | 0.022707461  | 1.121834086  | 1.279601398  |
| 6 | 0.232836773  | 0.080698989  | -0.800539349 |
| 6 | -0.130089166 | -0.159090635 | -2.273971485 |
| 1 | -0.276990743 | -0.672760174 | -0.189272647 |
| 1 | 1.304708345  | -0.102561939 | -0.652137711 |

|   |              |              |              |
|---|--------------|--------------|--------------|
| 1 | -1.194033998 | 0.002474174  | -2.470442564 |
| 1 | 0.094676947  | -1.202299700 | -2.524556222 |
| 1 | 0.433500887  | 0.468947842  | -2.965947255 |
| 6 | 1.367678836  | 2.696934170  | -1.942052917 |
| 1 | 1.897344104  | 2.241384534  | 0.088492866  |
| 1 | 0.495902113  | 2.859527277  | -2.581900343 |
| 1 | 1.906969597  | 1.818955345  | -2.304324968 |
| 1 | 2.036924282  | 3.556941824  | -2.038486009 |
| 1 | -6.274548981 | 1.814853414  | -0.701695521 |
| 1 | 0.184197312  | 1.924303607  | 1.830578372  |
| 8 | 0.828025677  | 3.064565284  | 3.122911508  |
| 1 | 1.553190919  | 2.540380114  | 3.502639300  |
| 1 | 1.273803672  | 3.682261012  | 2.506096089  |

**Supplementary Table S21.** DFT-optimized Cartesian coordinates for structure **D**

|   |              |              |              |
|---|--------------|--------------|--------------|
| 6 | -5.117478434 | 2.167564253  | -0.778028230 |
| 6 | -3.922105955 | 2.814358305  | -0.452379116 |
| 6 | -2.757882475 | 2.099367704  | -0.138194931 |
| 6 | -5.163704887 | 0.764925123  | -0.797597328 |
| 6 | -2.813894971 | 0.696781490  | -0.157507495 |
| 6 | -4.015676759 | 0.049020145  | -0.489515826 |
| 6 | -1.476612657 | 2.887804941  | 0.190948963  |
| 7 | -0.322710159 | 1.953071164  | 0.395060907  |
| 6 | -0.318403846 | 0.614368500  | -0.059937952 |
| 6 | -1.605678998 | -0.137555809 | 0.202074822  |
| 8 | 0.754316663  | 2.460504507  | 0.887403287  |
| 6 | -1.727775586 | 3.669267499  | 1.523937941  |
| 6 | -0.833591143 | 4.860029260  | 1.887083382  |
| 1 | -1.704013166 | 2.930199352  | 2.335029072  |
| 1 | -2.759462275 | 4.032749509  | 1.480645667  |
| 1 | 0.215502674  | 4.573378349  | 1.965658144  |
| 1 | -1.158828892 | 5.261162428  | 2.854583688  |
| 1 | -0.922121098 | 5.670460605  | 1.155364001  |
| 6 | -1.177258674 | 3.814513677  | -1.041924046 |
| 6 | 0.238267377  | 4.370209752  | -1.241204872 |
| 1 | -1.883634769 | 4.651368439  | -0.982785158 |
| 1 | -1.447240497 | 3.252471939  | -1.943768038 |
| 1 | 0.599613722  | 4.942154078  | -0.385314349 |
| 1 | 0.226642053  | 5.034409310  | -2.114461302 |
| 1 | 0.959780240  | 3.573820004  | -1.442156340 |
| 1 | -3.923556733 | 3.898953410  | -0.450068215 |
| 1 | -6.081386064 | 0.248045940  | -1.054330381 |
| 1 | -4.038931623 | -1.037984731 | -0.505872941 |
| 6 | -1.683586123 | -0.602622964 | 1.679245530  |
| 1 | -2.615341807 | -1.150470149 | 1.859005624  |

|   |              |              |              |
|---|--------------|--------------|--------------|
| 1 | -1.653742085 | 0.253116750  | 2.362890186  |
| 1 | -0.840949195 | -1.262456039 | 1.912224306  |
| 1 | -1.607369872 | -1.033210187 | -0.427164513 |
| 6 | 0.771165285  | 0.005065597  | -0.575949171 |
| 6 | 2.127920776  | 0.566846296  | -0.879136281 |
| 1 | 2.458639546  | 0.226888337  | -1.868410624 |
| 1 | 2.870465661  | 0.198239779  | -0.156773409 |
| 1 | 2.149897298  | 1.656566489  | -0.844472441 |
| 1 | 0.639581053  | -1.050213348 | -0.810161529 |
| 6 | -6.301005056 | 3.006513832  | -1.097240508 |
| 8 | -7.400487464 | 2.282694008  | -1.391993487 |
| 8 | -6.306147199 | 4.228078850  | -1.099631241 |
| 1 | -8.120265885 | 2.913717607  | -1.588178794 |

**Supplementary Table S22.** DFT-optimized Cartesian coordinates for model **D** + H<sub>2</sub>O

|   |              |              |              |
|---|--------------|--------------|--------------|
| 6 | -5.198407360 | 2.208947547  | -0.671305982 |
| 6 | -3.973499205 | 2.809598930  | -0.368948860 |
| 6 | -2.818336056 | 2.051199302  | -0.132416893 |
| 6 | -5.282638102 | 0.810263877  | -0.751714148 |
| 6 | -2.908958525 | 0.653199621  | -0.222609105 |
| 6 | -4.141721659 | 0.052824591  | -0.530124174 |
| 6 | -1.498579573 | 2.794158783  | 0.147842808  |
| 7 | -0.393746109 | 1.809605425  | 0.390599356  |
| 6 | -0.402669335 | 0.501314936  | -0.145748233 |
| 6 | -1.713267234 | -0.236266199 | 0.035412148  |
| 8 | 0.658182324  | 2.233332710  | 1.004962259  |
| 6 | -1.674167997 | 3.658191058  | 1.440582640  |
| 6 | -0.787655578 | 4.888820970  | 1.663903810  |
| 1 | -1.577387547 | 2.976534058  | 2.293795397  |
| 1 | -2.712192389 | 4.002317891  | 1.449909742  |
| 1 | 0.273324315  | 4.641791088  | 1.720000703  |
| 1 | -1.079460071 | 5.359058699  | 2.611088805  |
| 1 | -0.929036189 | 5.637529031  | 0.876635610  |
| 6 | -1.172881723 | 3.617777768  | -1.150713351 |
| 6 | 0.264559211  | 4.091915760  | -1.389200044 |
| 1 | -1.847820360 | 4.481882441  | -1.154222544 |
| 1 | -1.468180941 | 2.999136685  | -2.006105782 |
| 1 | 0.645564146  | 4.737730272  | -0.597118315 |
| 1 | 0.292260610  | 4.659928266  | -2.326884823 |
| 1 | 0.951126761  | 3.247464532  | -1.500997137 |
| 1 | -3.942260660 | 3.892820335  | -0.325461704 |
| 1 | -6.223893835 | 0.328316809  | -0.990146884 |
| 1 | -4.194983964 | -1.030986094 | -0.597869951 |
| 6 | -1.793703639 | -0.848977549 | 1.458353516  |
| 1 | -2.732373793 | -1.399494293 | 1.585048948  |



|   |              |              |              |
|---|--------------|--------------|--------------|
| 1 | -1.751461512 | -0.065510420 | 2.223633033  |
| 1 | -0.959632105 | -1.539593220 | 1.621269186  |
| 1 | -1.739156486 | -1.062202891 | -0.683294014 |
| 6 | 0.690555494  | -0.105842275 | -0.656416676 |
| 6 | 2.081846321  | 0.413034620  | -0.859776975 |
| 1 | 2.388654934  | 0.259049018  | -1.902530028 |
| 1 | 2.789148491  | -0.157417798 | -0.241863324 |
| 1 | 2.193045889  | 1.465353544  | -0.601649885 |
| 1 | 0.532481204  | -1.135317409 | -0.974767482 |
| 6 | -6.372007270 | 3.090398204  | -0.901144693 |
| 8 | -7.501633990 | 2.407014974  | -1.177252503 |
| 8 | -6.345177560 | 4.310548085  | -0.849465759 |
| 1 | -8.213475527 | 3.062824037  | -1.311307455 |
| 8 | 2.791612153  | 4.101336550  | 0.939788908  |
| 1 | 3.060896011  | 3.953331398  | 1.860467788  |
| 1 | 2.012638431  | 3.522886331  | 0.836752066  |

**Supplementary Table S23.** DFT-optimized Cartesian coordinates for structure E

|   |              |              |              |
|---|--------------|--------------|--------------|
| 6 | -4.353965660 | 1.847894055  | 0.856043439  |
| 6 | -3.135648771 | 2.502532392  | 0.629723876  |
| 6 | -2.030897523 | 1.848938681  | 0.077935909  |
| 6 | -4.457991991 | 0.488820255  | 0.546861785  |
| 6 | -2.135723716 | 0.467122915  | -0.209785593 |
| 6 | -3.352464947 | -0.183824026 | 0.033546893  |
| 6 | -0.765629897 | 2.656476915  | -0.247539557 |
| 7 | 0.392490169  | 1.720092038  | -0.458762932 |
| 6 | 0.334137492  | 0.294251737  | -0.014247030 |
| 6 | -0.917973500 | -0.304382326 | -0.715479547 |
| 6 | -0.967735986 | 3.413177984  | -1.599995052 |
| 6 | -2.016212960 | 4.528242658  | -1.623920244 |
| 1 | -1.218659292 | 2.663085346  | -2.360151250 |
| 1 | 0.001378263  | 3.825764181  | -1.885485490 |
| 1 | -3.027583021 | 4.159061270  | -1.429260517 |
| 1 | -2.022033337 | 4.989594991  | -2.618071588 |
| 1 | -1.796341700 | 5.319406024  | -0.898434535 |
| 6 | -0.389217005 | 3.606299580  | 0.929881221  |
| 6 | 0.887561839  | 4.434216440  | 0.746831118  |
| 1 | -0.301033363 | 2.986361499  | 1.829334479  |
| 1 | -1.220995836 | 4.294018808  | 1.108848512  |
| 1 | 1.767423511  | 3.802796648  | 0.596283650  |
| 1 | 1.055488113  | 5.044033445  | 1.642199881  |
| 1 | 0.814474343  | 5.115872744  | -0.107956473 |
| 8 | 1.355300885  | 2.098388609  | -1.220353479 |
| 8 | 0.080451461  | 0.249118396  | 1.380956861  |
| 6 | 1.650318445  | -0.417752459 | -0.369426175 |

|   |              |              |              |
|---|--------------|--------------|--------------|
| 6 | 2.892991004  | 0.077594433  | 0.384340550  |
| 1 | 1.811759082  | -0.346486378 | -1.448658079 |
| 1 | 1.506282992  | -1.474978171 | -0.131811259 |
| 1 | 3.091567221  | 1.133301995  | 0.186910658  |
| 1 | 3.766315239  | -0.500352722 | 0.063966755  |
| 1 | 2.800928425  | -0.067943463 | 1.468196231  |
| 6 | -1.042692456 | -1.828396814 | -0.573066856 |
| 1 | -1.907155050 | -2.198825379 | -1.130675650 |
| 1 | -1.152466288 | -2.126730897 | 0.474345508  |
| 1 | -0.164868897 | -2.328749277 | -0.987036857 |
| 1 | -0.785357897 | -0.083115353 | -1.784240599 |
| 1 | -3.082747952 | 3.549260649  | 0.898627104  |
| 1 | -5.366787274 | -0.077364878 | 0.733945828  |
| 1 | -3.448959386 | -1.243667458 | -0.167554016 |
| 6 | -5.466007968 | 2.645930660  | 1.446848558  |
| 8 | -6.710885589 | 2.120095942  | 1.413634946  |
| 8 | -5.311466491 | 3.742664952  | 1.955864277  |
| 1 | -6.737904263 | 1.292575779  | 0.902752726  |
| 1 | 0.882153533  | 0.546213578  | 1.843695012  |

**Supplementary Table S24.** DFT-optimized Cartesian coordinates for model E + H<sub>2</sub>O

|   |              |              |              |
|---|--------------|--------------|--------------|
| 6 | -4.321586554 | 0.557530335  | -0.737087491 |
| 6 | -3.194264977 | 1.357551178  | -0.526559496 |
| 6 | -1.999691373 | 0.834471901  | -0.020862097 |
| 6 | -4.253321309 | -0.807400407 | -0.435361105 |
| 6 | -1.917861183 | -0.550536133 | 0.248908257  |
| 6 | -3.061258135 | -1.341057129 | 0.041227601  |
| 6 | -0.833327402 | 1.816227429  | 0.219846081  |
| 1 | -3.271838922 | 2.411294601  | -0.770516624 |
| 1 | -5.115451931 | -1.448426696 | -0.582043694 |
| 1 | -3.024404371 | -2.402982809 | 0.251719744  |
| 7 | 0.342555521  | 1.034859243  | 0.726613275  |
| 6 | 0.579918866  | -0.357417062 | 0.213562683  |
| 6 | -0.617444576 | -1.190929772 | 0.741836169  |
| 8 | 0.843330183  | 1.334194284  | 1.874037200  |
| 6 | -5.549426905 | 1.198042723  | -1.272123027 |
| 8 | -6.575944929 | 0.335697615  | -1.423054678 |
| 1 | -7.332076833 | 0.842658449  | -1.777981108 |
| 8 | -5.647470695 | 2.382658292  | -1.554699266 |
| 6 | -1.284415065 | 2.820793080  | 1.323588728  |
| 6 | -0.427756811 | 4.063949319  | 1.590394054  |
| 1 | -1.408628969 | 2.255472576  | 2.252992966  |
| 1 | -2.284116921 | 3.158948025  | 1.034226831  |
| 1 | 0.594918989  | 3.803818718  | 1.869976201  |
| 1 | -0.873191658 | 4.627763953  | 2.419006952  |

|   |              |              |              |
|---|--------------|--------------|--------------|
| 1 | -0.396163802 | 4.733119890  | 0.724087031  |
| 6 | -0.474234571 | 2.535053329  | -1.126857919 |
| 6 | 0.959183149  | 3.062193898  | -1.268816875 |
| 1 | -1.180238002 | 3.365305976  | -1.245496346 |
| 1 | -0.668048818 | 1.839999729  | -1.947707146 |
| 1 | 1.688535342  | 2.245959690  | -1.272043196 |
| 1 | 1.240781961  | 3.753433778  | -0.471485444 |
| 1 | 1.056350558  | 3.592591874  | -2.223370797 |
| 6 | -0.496196950 | -2.685028509 | 0.398029736  |
| 1 | -0.572186236 | -1.097204110 | 1.835949644  |
| 1 | -1.296868511 | -3.261000380 | 0.868481373  |
| 1 | 0.444969593  | -3.092669993 | 0.774182581  |
| 1 | -0.538778210 | -2.848770410 | -0.683195128 |
| 6 | 1.951330498  | -0.865427010 | 0.693264081  |
| 6 | 3.148218057  | 0.009527667  | 0.298247835  |
| 1 | 2.080779224  | -1.857679492 | 0.251362823  |
| 1 | 1.927338788  | -1.000269992 | 1.777121683  |
| 1 | 3.235972605  | 0.128893855  | -0.789432402 |
| 1 | 4.075073912  | -0.465927696 | 0.636283646  |
| 1 | 3.089112877  | 1.001302090  | 0.751901535  |
| 8 | 0.490908432  | -0.349561091 | -1.194863407 |
| 1 | 1.317056904  | 0.011448007  | -1.557971636 |
| 8 | 0.535427666  | -0.417315513 | 4.079669016  |
| 1 | 0.708386238  | 0.174478620  | 3.319604286  |
| 1 | -0.382204744 | -0.215925920 | 4.323126870  |

- [1] C.D. Smith, J.P. Bartley, S.E. Bottle, A.S. Micallef, D.A. Reid, Electrospray ionization mass spectrometry of stable nitroxide free radicals and two isoindoline nitroxide dimers, *J. Mass Spectrom.* 35 (2000) 607–611. [https://doi.org/10.1002/\(SICI\)1096-9888\(200005\)35:5<607::AID-JMS967>3.0.CO;2-7](https://doi.org/10.1002/(SICI)1096-9888(200005)35:5<607::AID-JMS967>3.0.CO;2-7).
